# Supplementary material
Source: publisher figshare collection journal article supplement (https://tandf.figshare.com/articles/dataset/_/13221271)
Supplement: Supplementary file 1 [file 1]

Beantwoord de volgende vragen door een kruisje te zetten bij het cijfer dat het beste uw vertrouwen weergeeft. Zet geen kruisjes tussen getallen in.

1. **Hoeveel vertrouwen heeft u dat u veilig over een vlakke ondergrond, zoals een houtenvloer, zou kunnen lopen?**

|   |   |   |   |   |   |   |   |   |    |
|---|---|---|---|---|---|---|---|---|----|
| 1 | 2 | 3 | 4 | 5 | 6 | 7 | 8 | 9 | 10 |
|   |   |   |   |   |   |   |   |   |    |

Geen Vertrouwen

Volledig Vertrouwen

2. **Hoeveel vertrouwen heeft u dat u veilig over gras zou kunnen lopen?**

|   |   |   |   |   |   |   |   |   |    |
|---|---|---|---|---|---|---|---|---|----|
| 1 | 2 | 3 | 4 | 5 | 6 | 7 | 8 | 9 | 10 |
|   |   |   |   |   |   |   |   |   |    |

Geen Vertrouwen

Volledig Vertrouwen

3. **Hoeveel vertrouwen heeft u dat u veilig over een obstakel op uw pad zou kunnen stappen?**

|   |   |   |   |   |   |   |   |   |    |
|---|---|---|---|---|---|---|---|---|----|
| 1 | 2 | 3 | 4 | 5 | 6 | 7 | 8 | 9 | 10 |
|   |   |   |   |   |   |   |   |   |    |

Geen Vertrouwen

Volledig Vertrouwen

4. **Hoeveel vertrouwen heeft u dat u veilig van een stoeprand af zou kunnen stappen?**

|   |   |   |   |   |   |   |   |   |    |
|---|---|---|---|---|---|---|---|---|----|
| 1 | 2 | 3 | 4 | 5 | 6 | 7 | 8 | 9 | 10 |
|   |   |   |   |   |   |   |   |   |    |

Geen Vertrouwen

Volledig Vertrouwen

5. **Hoeveel vertrouwen heeft u dat u veilig een stoeprand op zou kunnen stappen?**

|   |   |   |   |   |   |   |   |   |    |
|---|---|---|---|---|---|---|---|---|----|
| 1 | 2 | 3 | 4 | 5 | 6 | 7 | 8 | 9 | 10 |
|   |   |   |   |   |   |   |   |   |    |

Geen Vertrouwen

Volledig Vertrouwen

6. **Hoeveel vertrouwen heeft u dat u veilig een trap op zou kunnen lopen als u zich vasthoudt aan de leuning?**

|   |   |   |   |   |   |   |   |   |    |
|---|---|---|---|---|---|---|---|---|----|
| 1 | 2 | 3 | 4 | 5 | 6 | 7 | 8 | 9 | 10 |
|   |   |   |   |   |   |   |   |   |    |

Geen Vertrouwen

Volledig Vertrouwen

7. **Hoeveel vertrouwen heeft u dat u veilig een trap af zou kunnen lopen als u zich vasthoudt aan de leuning?**

|   |   |   |   |   |   |   |   |   |    |
|---|---|---|---|---|---|---|---|---|----|
| 1 | 2 | 3 | 4 | 5 | 6 | 7 | 8 | 9 | 10 |
|   |   |   |   |   |   |   |   |   |    |

Geen Vertrouwen

Volledig Vertrouwen

8. **Hoeveel vertrouwen heeft u dat u veilig een trap op zou kunnen lopen als u zich NIET vasthoudt aan de leuning?**

|   |   |   |   |   |   |   |   |   |    |
|---|---|---|---|---|---|---|---|---|----|
| 1 | 2 | 3 | 4 | 5 | 6 | 7 | 8 | 9 | 10 |
|   |   |   |   |   |   |   |   |   |    |

Geen Vertrouwen

Volledig Vertrouwen

**9. Hoeveel vertrouwen heeft u dat u veilig een trap af zou kunnen lopen als u zich NIET vasthoudt aan de leuning?**

|   |   |   |   |   |   |   |   |   |    |
|---|---|---|---|---|---|---|---|---|----|
| 1 | 2 | 3 | 4 | 5 | 6 | 7 | 8 | 9 | 10 |
|   |   |   |   |   |   |   |   |   |    |

Geen Vertrouwen

Volledig Vertrouwen

**10. Hoeveel vertrouwen heeft u dat veilig een lange afstand, zoals 1 kilometer, zou kunnen lopen?**

|   |   |   |   |   |   |   |   |   |    |
|---|---|---|---|---|---|---|---|---|----|
| 1 | 2 | 3 | 4 | 5 | 6 | 7 | 8 | 9 | 10 |
|   |   |   |   |   |   |   |   |   |    |

Geen Vertrouwen

Volledig Vertrouwen
